# Supplementary material for: Health-related quality of life after traumatic brain injury: deriving value sets for the QOLIBRI-OS for Italy, The Netherlands and The United Kingdom
Source: Springer Nature journal article supplement (doi:10.1007/s11136-020-02583-6), 2020-07-15
Supplement: MOESM3 [file 18185974]

Appendix C. QOLIBRI-OS non-parametric model per country

|                                                                             | All respondents |             |          |             | UK         |              |          |              | The Netherlands |              |          |              | Italy      |             |          |             |
|-----------------------------------------------------------------------------|-----------------|-------------|----------|-------------|------------|--------------|----------|--------------|-----------------|--------------|----------|--------------|------------|-------------|----------|-------------|
|                                                                             | Unanchored      |             | Anchored |             | Unanchored |              | Anchored |              | Unanchored      |              | Anchored |              | Unanchored |             | Anchored |             |
|                                                                             | Mean            | 95% CI      | Mean     | 95% CI      | Mean       | 95% CI       | Mean     | 95% CI       | Mean            | 95% CI       | Mean     | 95% CI       | Mean       | 95% CI      | Mean     | 95% CI      |
| <b>Physical condition</b>                                                   |                 |             |          |             |            |              |          |              |                 |              |          |              |            |             |          |             |
| Quite                                                                       | 0.121           | 0.057-0.182 | 0.012    | 0.006-0.019 | 0.135      | 0.029-0.241  | 0.014    | 0.003-0.025  | 0.090*          | -0.017-0.195 | 0.010*   | -0.002-0.021 | 0.128      | 0.017-0.240 | 0.012    | 0.002-0.023 |
| Moderately                                                                  | 0.289           | 0.219-0.357 | 0.030    | 0.023-0.037 | 0.290      | 0.171-0.405  | 0.030    | 0.0178-0.042 | 0.317           | 0.211-0.422  | 0.034    | 0.023-0.045  | 0.260      | 0.135-0.375 | 0.025    | 0.013-0.036 |
| Slightly                                                                    | 0.548           | 0.483-0.613 | 0.057    | 0.050-0.063 | 0.521      | 0.411-0.630  | 0.054    | 0.043-0.066  | 0.482           | 0.377-0.585  | 0.052    | 0.041-0.063  | 0.624      | 0.505-0.749 | 0.060    | 0.049-0.072 |
| Not at all                                                                  | 1.349           | 1.275-1.421 | 0.139    | 0.132-0.146 | 1.419      | 1.290-1.549  | 0.148    | 0.1360-0.159 | 1.124           | 1.002-1.248  | 0.121    | 0.110-0.132  | 1.517      | 1.395-1.643 | 0.146    | 0.135-0.156 |
| <b>How brain is working, in terms of concentration, memory and thinking</b> |                 |             |          |             |            |              |          |              |                 |              |          |              |            |             |          |             |
| Quite                                                                       | 0.157           | 0.091-0.224 | 0.016    | 0.009-0.023 | 0.241      | 0.137-0.348  | 0.025    | 0.014-0.036  | 0.081*          | -0.028-0.189 | 0.009*   | -0.003-0.020 | 0.173      | 0.049-0.289 | 0.017    | 0.005-0.028 |
| Moderately                                                                  | 0.380           | 0.308-0.451 | 0.039    | 0.032-0.046 | 0.376      | 0.259-0.488  | 0.039    | 0.027-0.051  | 0.353           | 0.228-0.476  | 0.038    | 0.025-0.051  | 0.459      | 0.336-0.579 | 0.044    | 0.032-0.055 |
| Slightly                                                                    | 0.704           | 0.640-0.769 | 0.073    | 0.066-0.079 | 0.719      | 0.609-0.835  | 0.075    | 0.063-0.088  | 0.630           | 0.531-0.734  | 0.068    | 0.057-0.079  | 0.793      | 0.688-0.903 | 0.076    | 0.066-0.087 |
| Not at all                                                                  | 1.619           | 1.548-1.691 | 0.167    | 0.160-0.173 | 1.597      | 1.486-1.716  | 0.167    | 0.156-0.177  | 1.354           | 1.239-1.476  | 0.146    | 0.135-0.157  | 1.959      | 1.836-2.086 | 0.188    | 0.177-0.199 |
| <b>Feelings and emotions</b>                                                |                 |             |          |             |            |              |          |              |                 |              |          |              |            |             |          |             |
| Quite                                                                       | 0.166           | 0.100-0.235 | 0.017    | 0.010-0.024 | 0.253      | 0.141-0.369  | 0.026    | 0.015-0.038  | -0.002*         | -0.105-0.108 | 0.000*   | -0.011-0.011 | 0.243      | 0.120-0.369 | 0.023    | 0.011-0.035 |
| Moderately                                                                  | 0.223           | 0.159-0.288 | 0.023    | 0.017-0.030 | 0.168      | 0.062-0.275  | 0.018    | 0.007-0.029  | 0.225           | 0.117-0.336  | 0.024    | 0.013-0.036  | 0.301      | 0.185-0.419 | 0.029    | 0.018-0.040 |
| Slightly                                                                    | 0.336           | 0.270-0.401 | 0.035    | 0.028-0.041 | 0.267      | 0.157-0.379  | 0.028    | 0.016-0.040  | 0.403           | 0.299-0.502  | 0.043    | 0.032-0.054  | 0.341      | 0.224-0.458 | 0.033    | 0.021-0.044 |
| Not at all                                                                  | 0.940           | 0.877-1.005 | 0.097    | 0.091-0.103 | 0.936      | 0.835-1.045  | 0.098    | 0.089-0.107  | 0.911           | 0.807-1.020  | 0.098    | 0.088-0.108  | 1.013      | 0.896-1.135 | 0.097    | 0.088-0.107 |
| <b>Ability to carry out day to day activities</b>                           |                 |             |          |             |            |              |          |              |                 |              |          |              |            |             |          |             |
| Quite                                                                       | 0.132           | 0.058-0.205 | 0.014    | 0.006-0.021 | 0.127      | 0.007-0.249  | 0.013    | 0.001-0.026  | 0.077*          | -0.046-0.197 | 0.008*   | -0.005-0.021 | 0.223      | 0.100-0.346 | 0.021    | 0.010-0.033 |
| Moderately                                                                  | 0.228           | 0.162-0.295 | 0.023    | 0.017-0.030 | 0.218      | 0.110-0.324  | 0.023    | 0.012-0.034  | 0.212           | 0.100-0.321  | 0.023    | 0.011-0.034  | 0.314      | 0.190-0.439 | 0.030    | 0.018-0.042 |
| Slightly                                                                    | 0.330           | 0.261-0.404 | 0.034    | 0.027-0.041 | 0.236      | 0.124-0.354  | 0.025    | 0.013-0.037  | 0.440           | 0.327-0.557  | 0.047    | 0.035-0.060  | 0.343      | 0.210-0.489 | 0.033    | 0.020-0.046 |
| Not at all                                                                  | 1.108           | 1.037-1.177 | 0.114    | 0.108-0.121 | 1.152      | 1.035-1.267  | 0.120    | 0.109-0.131  | 1.134           | 1.011-1.254  | 0.122    | 0.110-0.134  | 1.106      | 0.985-1.227 | 0.106    | 0.096-0.117 |
| <b>Personal and social life</b>                                             |                 |             |          |             |            |              |          |              |                 |              |          |              |            |             |          |             |
| Quite                                                                       | 0.097           | 0.026-0.165 | 0.010    | 0.003-0.017 | 0.064*     | -0.055-0.176 | 0.007*   | -0.006-0.018 | 0.090*          | -0.031-0.203 | 0.010*   | -0.003-0.021 | 0.128      | 0.007-0.246 | 0.012    | 0.001-0.023 |
| Moderately                                                                  | 0.251           | 0.174-0.330 | 0.026    | 0.018-0.034 | 0.025*     | -0.1-0.156   | 0.003*   | -0.010-0.016 | 0.376           | 0.254-0.494  | 0.040    | 0.028-0.053  | 0.348      | 0.198-0.497 | 0.033    | 0.019-0.047 |
| Slightly                                                                    | 0.370           | 0.311-0.433 | 0.038    | 0.032-0.045 | 0.192      | 0.094-0.293  | 0.020    | 0.010-0.030  | 0.616           | 0.512-0.723  | 0.066    | 0.055-0.078  | 0.329      | 0.216-0.488 | 0.032    | 0.021-0.043 |
| Not at all                                                                  | 0.989           | 0.925-1.051 | 0.102    | 0.096-0.108 | 0.915      | 0.801-1.026  | 0.095    | 0.085-0.106  | 1.140           | 1.036-1.245  | 0.123    | 0.113-0.133  | 0.923      | 0.811-1.033 | 0.089    | 0.079-0.098 |

\* Not significant, p-value < 0.05  
95% CI, 95% credible interval
